# Supplementary material
Source: publisher figshare collection journal article supplement (https://tandf.figshare.com/ndownloader/files/17991617)
Supplement: Supplementary file 1 [file 17991617]

**Computationally guided identification of Akt-3, a serine/threonine kinase inhibitors: Insights from homology modelling, structure-based screening, molecular dynamics and quantum mechanical calculations**

Shubham Srivastava<sup>1</sup>, Pakhuri Mehta<sup>1</sup>, Omprakash Sharma<sup>1</sup>, Manish Sharma<sup>2</sup>, Ruchi Malik<sup>1\*</sup>

<sup>1</sup>Department of Pharmacy, School of Chemical Sciences and Pharmacy, Central University of Rajasthan, Bandarsindri, Ajmer, Rajasthan, India – 305817

<sup>2</sup>School of Pharmacy, Maharishi Markandeshwar University, Sadopur, Ambala, Haryana India- 134007.

**Supplementary Information**

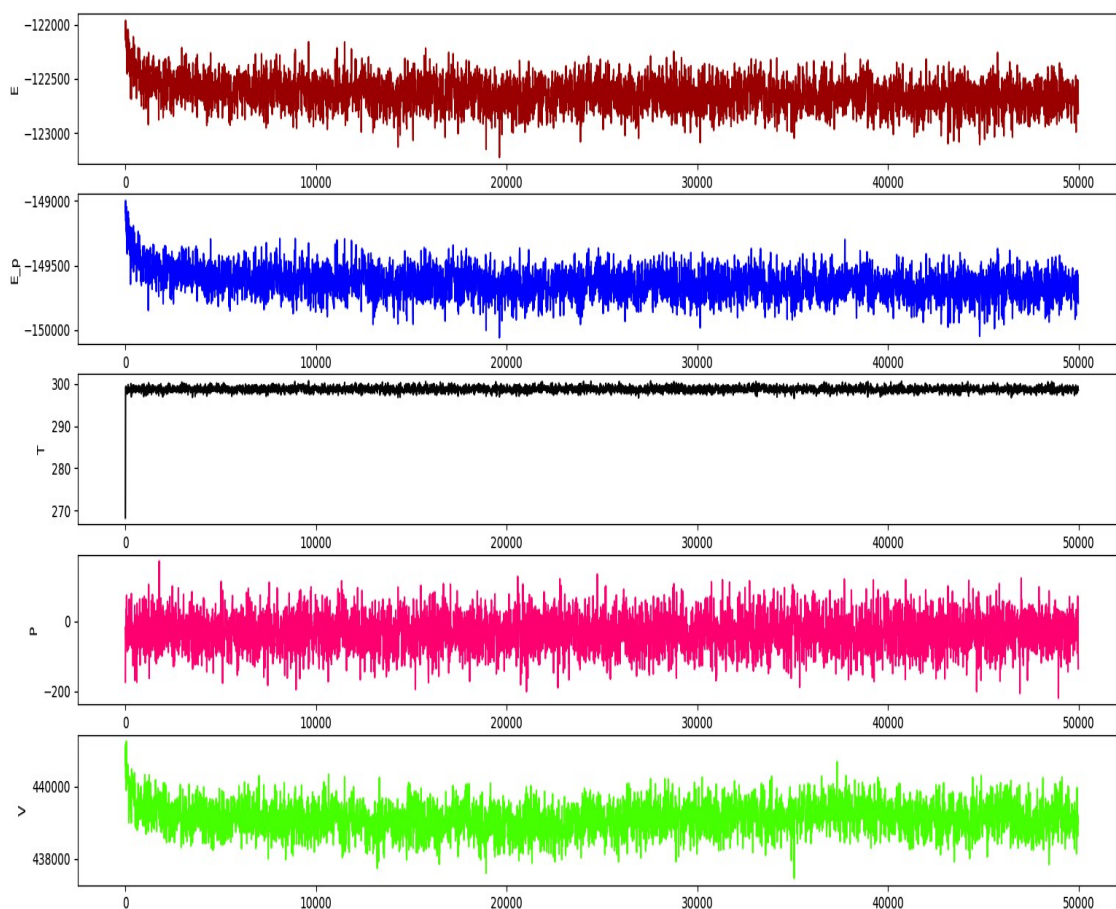

**Figure S1:** Simulation quality plot for apo protein

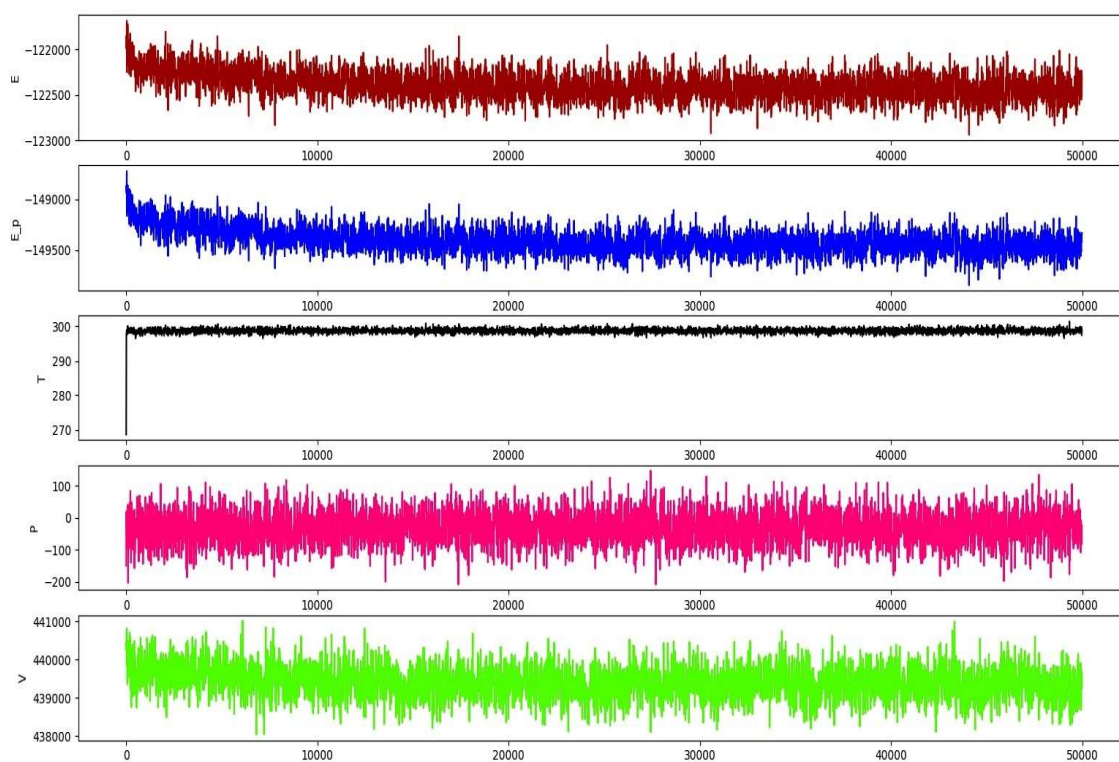

**Figure S2:** Simulation quality plot for ZINC04196061

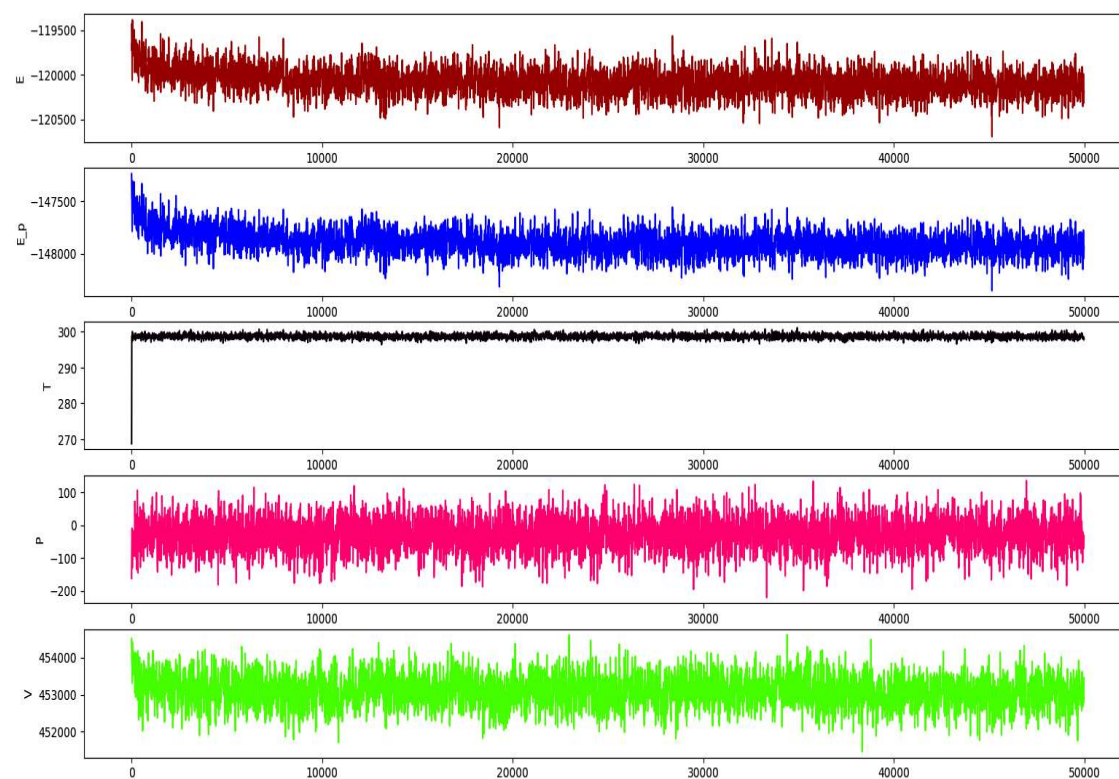

**Figure S3:** Simulation quality plot for ZINC08396840

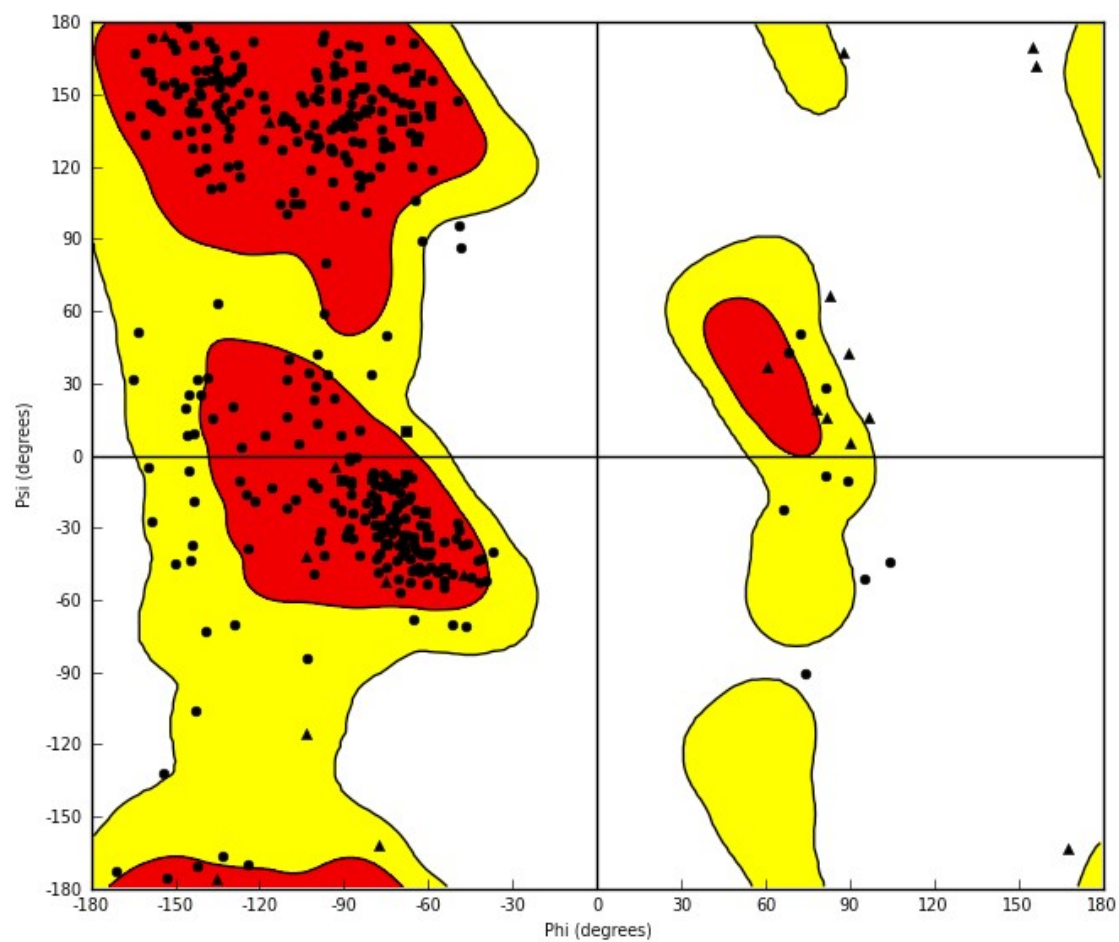

**Figure S4:** Ramachandran Plot of Akt-3 modelled protein post MD simulations
